# Supplementary material for: Effectiveness and Acceptance of Multimodal Antibiotic Stewardship Program: Considering Progressive Implementation and Complementary Strategies
Source: MDPI journal article supplement (doi:10.3390/antibiotics9120848), 2020-11-27
Supplement: s1 [file s1]

## Supplementary Materials

# Effectiveness and Acceptance of Multimodal Antibiotic Stewardship Program: Considering Progressive Implementation and Complementary Strategies

Flavien Bouchet <sup>1,2,\*</sup>, Vincent Le Moing <sup>1</sup>, Delphine Dirand <sup>2</sup>, François Cros <sup>3</sup>, Alexi Lienard <sup>4</sup>, Jacques Reynes <sup>1</sup>, Laurent Giraudon <sup>2</sup> and David Morquin <sup>1</sup>

<sup>1</sup> Service de Maladies Infectieuses et Tropicales, Centre Hospitalier Universitaire de Montpellier, Université de Montpellier, 34000 Montpellier, France; v-le\_moing@chu-montpellier.fr (V.L.M.); j-reynes@chu-montpellier.fr (J.R.); d-morquin@chu-montpellier.fr (D.M.)

<sup>2</sup> Pôle Appui aux Fonctions Cliniques, Département de la Pharmacie, Hôpitaux du bassin de Thau, Sète, 34200 Sète, France; ddirand@ch-bassindethau.fr (D.D.); lgiraudon@ch-bassindethau.fr (L.G.)

<sup>3</sup> Département Informatique, Hôpitaux du Bassin de Thau, Sète, 34200 Sète, France; fcros@ch-bassindethau.fr

<sup>4</sup> Département de Biologie Médicale, Hôpitaux du Bassin de Thau, Sète, 34200 Sète, France; alienard@ch-bassindethau.fr

\* Correspondence: fbouchet@ch-bassindethau.fr

**Table S1.** Satisfaction survey regarding the antibiotic stewardship program in a tertiary hospital

Question 1: You are satisfied with the availability of this type of intervention within the hospital center

Question 2: This kind of intervention relieves you in your daily practice

Question 3: This kind of intervention is profitable for the patient

Question 4: Notification in electronic patient record is very satisfactory

Question 5a: Infectious disease specialist is easy to reach for this kind of intervention

Question 5b: I am satisfied with the systematic phone call of the infectious disease specialist just after the notification in electronic patient record

Question 6: The therapeutic or diagnosis proposal noted in the electronic patient record is sufficiently understandable

Question 7: This kind of intervention interfering with your medical practice

Question 8: It would be interesting to continue this kind of intervention in your hospital

Regarding on-request IDSCS intervention: 49 answers

|             | Strongly disagree | Somewhat disagree | Somewhat agree | Strongly agree |
|-------------|-------------------|-------------------|----------------|----------------|
| Question 1  |                   |                   | 1              | 48             |
| Question 2  |                   |                   | 12             | 36             |
| Question 3  |                   |                   | 5              | 44             |
| Question 4  |                   |                   | 5              | 44             |
| Question 5a |                   |                   | 9              | 39             |
| Question 6  |                   |                   | 2              | 46             |
| Question 7  | 33                | 13                | 3              |                |
| Question 8  |                   |                   | 3              | 46             |

Regarding Microbiological laboratory meetings intervention: 49 answers

|             | Strongly disagree | Somewhat disagree | Somewhat agree | Strongly agree |
|-------------|-------------------|-------------------|----------------|----------------|
| Question 1  | 1                 |                   | 6              | 42             |
| Question 2  |                   | 2                 | 9              | 38             |
| Question 3  |                   |                   | 6              | 43             |
| Question 4  |                   | 1                 | 7              | 41             |
| Question 5b |                   | 2                 | 5              | 42             |
| Question 6  |                   | 2                 | 6              | 41             |
| Question 7  | 30                | 16                | 3              |                |
| Question 8  |                   |                   | 7              | 42             |

Regarding prospective audit and feedback interventions (critical antibiotics prescription review and Longer than 7 days antibiotic prescription review): 49 answers

|             | Strongly disagree | Somewhat disagree | Somewhat agree | Strongly agree | Not applicable |
|-------------|-------------------|-------------------|----------------|----------------|----------------|
| Question 1  | 1                 | 1                 | 10             | 31             | 6              |
| Question 2  |                   | 3                 | 12             | 28             | 6              |
| Question 3  |                   | 2                 | 9              | 32             | 6              |
| Question 4  |                   | 3                 | 6              | 34             | 6              |
| Question 5b | 1                 | 2                 | 8              | 32             | 6              |
| Question 6  | 1                 | 2                 | 6              | 34             | 6              |
| Question 7  | 21                | 13                | 5              | 4              | 6              |
| Question 8  |                   | 2                 | 7              | 34             | 6              |
